# Supplementary material for: Development and Validation of Structured COVID Perception Interview Guide (COPING) for Assessing the Acute Impact of COVID-19 Diagnosis
Source: PubMed Central journal article supplement — J Neurosci Rural Pract. 2022 Feb 18;13(2):196–203. doi: 10.1055/s-0041-1742232 (PMC9187395; doi:10.1055/s-0041-1742232), 2022-02-18
Supplement: 10-1055-s-0041-1742232-s2192028.pdf [file 10-1055-s-0041-1742232-s2192028.pdf]

**Supplementary Table 1: In-depth interview schedule**

| क्र. | प्रश्न                                                                                                                                                                                                                                |
|------|---------------------------------------------------------------------------------------------------------------------------------------------------------------------------------------------------------------------------------------|
| 1.   | क्या आप कोवीड-19 के बारे में जानते हैं?                                                                                                                                                                                               |
| 2.   | क्या कारण है कि आपका कोरोना परीक्षण 'पॉज़िटिव' आया है?                                                                                                                                                                                |
| 3.   | कोरोना पॉज़िटिव टेस्ट आने वाले लोगों के साथ क्या होता है?                                                                                                                                                                             |
| 4.   | आप कोरोना के इलाज के बारे में क्या सोचते हैं?                                                                                                                                                                                         |
| 5.   | कोरोना के लिए पॉज़िटिव परीक्षण के बाद आप कैसा महसूस कर रहे हैं?                                                                                                                                                                       |
| 6.   | आप अपने मामले में कोरोना परीक्षण की विश्वसनीयता के बारे में क्या सोचते हैं?                                                                                                                                                           |
| 7.   | आप अपने परिवार के सदस्यों और रिश्तेदारों से मुलाकात की कोरोना स्थिति के बारे में क्या सोचते हैं?                                                                                                                                      |
| 8.   | चूंकि आपके समाज में एसटीडी या एचआईवी जैसी अन्य बीमारियों के सार्वजनिक रूप से घोषित करने के लिए आपकी सहमति की आवश्यकता है, परंतु कोरोना के संबंध में आपकी सहमति के बिना सार्वजनिक रूप से पॉज़िटिव घोषित किया जाना से आपकी क्या राय है? |
| 9.   | आपको क्या लगता है कि समाज आपके बारे में क्या सोच रहा है?                                                                                                                                                                              |
| 10.  | जब समाज की बात आती है तो आपके मन में किस तरह के विचार चल रहे हैं?                                                                                                                                                                     |
| 11.  | क्या आपको लगता है कि आपको अपने करीबी साथियों को अपनी स्थिति के बारे में सूचित करना चाहिए?                                                                                                                                             |
| 12.  | जब यह करीबी लोगों के फोन कॉल का जवाब देने की बात आती है तो आपको कैसा लगता है?                                                                                                                                                         |
| 13.  | आप अपनी नौकरी/व्यवसाय के बारे में क्या सोचते हैं?                                                                                                                                                                                     |
| 14.  | इससे पहले कि आपको रक्त परीक्षण के परिणामों के बारे में बताया गया, आप कैसा महसूस कर रहे थे?                                                                                                                                            |
| 15.  | क्या आपने पहले भी ऐसी ही स्थिति का सामना किया है?                                                                                                                                                                                     |
| 16.  | पंद्रह दिन अलग-थलग रहने पर आप इसे कैसे देखते हैं?                                                                                                                                                                                     |
| 17.  | आप डॉक्टरों, नर्सों और अन्य स्वास्थ्य देखभाल कार्यकर्ताओं के बारे में क्या सोचते हैं जो लगातार कॉविड रोगियों के करीब काम कर रहे हैं?                                                                                                  |
| 18.  | आपको क्या लगता है कि क्या आप अध्यात्म के माध्यम से इस स्थिति के दौरान शांति प्राप्त कर सकते हैं? टिप्पणी कीजिये.                                                                                                                      |
| 19.  | पिछले 7 दिनों के दौरान आपकी नींद कैसी थी?                                                                                                                                                                                             |

**Supplementary Table 2: List of 40 items generated after in-depth interviews and literature review**

| S.No. | Item description                                                                                                       |
|-------|------------------------------------------------------------------------------------------------------------------------|
| 1.    | मुझे लगता है कि मुझे संक्रमित व्यक्ति के करीबी संपर्क से संक्रमण मिला है।                                              |
| 2.    | मैं पूरी तरह से परीक्षण रिपोर्ट पर विश्वास करता हूँ/करती हूँ ।                                                         |
| 3.    | मेरे सहकर्मियों की वजह से मेरी रिपोर्ट positive आई है।                                                                 |
| 4.    | मेरी कमजोर immunity/प्रतिरक्षा के कारण मुझे संक्रमण हुआ है।                                                            |
| 5.    | यह बीमारी के पॉज़िटिव (Positive) परीक्षण किए गए व्यक्तियों को डॉक्टरों की करीबी निगरानी में रखा जाना चाहिए।            |
| 6.    | यह बीमारी के लक्षण आम फ्लू के समान हैं।                                                                                |
| 7.    | मेरी रिपोर्ट के बाद, मैं उन लोगों के बारे में चिंतित था/थी जो मेरे संपर्क में आए थे।                                   |
| 8.    | मेरी रिपोर्ट के बारे में मेरे करीबी लोगों को सूचित करना बहुत आवश्यक और सही है।                                         |
| 9.    | शरीर की immunity/प्रतिरक्षा, कोविड से लड़ने के साथ-साथ रक्षा कर सकती है।                                               |
| 10.   | मुझे अच्छा लगता है जब मेरे दोस्त और परिवार के सदस्य मुझसे फोन पर संपर्क करते हैं।                                      |
| 11.   | यह बीमारी के कारण सूखी खांसी, बुखार और सांस फूलना होता है।                                                             |
| 12.   | मेरे अपने लोग मेरी रिपोर्ट जानने के बाद मुझसे दूर हो रहे हैं।                                                          |
| 13.   | मैं इस महामारी के दौरान स्वास्थ्य देखभाल श्रमिकों द्वारा प्रदान की गई सेवाओं के लिए आभारी महसूस करता हूँ/करती हूँ ।    |
| 14.   | यह बीमारी के अधिकांश रोगियों को प्राथमिक उपचार की आवश्यकता होती है, केवल कुछ लोगों को विशेष उपचार की आवश्यकता होती है। |
| 15.   | मुझे नहीं लगता कि मेरे मामले में अस्पताल में रहने की सख्त आवश्यकता है।                                                 |
| 16.   | मुझे लगता है कि लोग मेरी स्थिति को समझ सकते हैं और ठीक होने के बाद वे मुझे स्वीकार करेंगे।                             |
| 17.   | परीक्षण रिपोर्ट पॉज़िटिव (Positive) आने के बाद मैं दुखी और चिंतित महसूस कर रहा था/रही थी।                              |
| 18.   | रिपोर्ट के बाद मेरी दिनचर्या पूरी तरह से गड़बड़ा गई है।                                                                |
| 19.   | मेरे रक्त का नमूना लेने के बाद मैं परीक्षण रिपोर्ट का सामना करने के लिए मानसिक रूप से तैयार था/थी।                     |
| 20.   | परीक्षण की रिपोर्ट पॉज़िटिव (Positive) आने के बाद मैं खुद को दोषी और कलंकित महसूस कर रहा था/रही थी।                    |
| 21.   | किसी भी बड़ी शारीरिक चोट या बीमारी के लक्षणों के बिना लंबे समय तक अस्पताल में रहने का यह मेरा पहला अनुभव है।           |
| 22.   | मुझे अपने अस्पताल में रहने के दौरान बहुत अकेलापन महसूस होने लगा है।                                                    |
| 23.   | परीक्षण करने की विधि पर मुझे संदेह है।                                                                                 |

|     |                                                                                                                                                       |
|-----|-------------------------------------------------------------------------------------------------------------------------------------------------------|
| 24. | परीक्षण रिपोर्ट के बाद मेरे परिवार, दोस्तों और सहकर्मियों के बारे में मेरे दिमाग में कई विचार चल रहे थे।                                              |
| 25. | मुझे लगता है कि वर्तमान स्थिति में भगवान से प्रार्थना करने से मुझे शक्ति और साहस मिलता है।                                                            |
| 26. | इस बीमारी का मुझ पर कोई प्रभाव नहीं है। (ना सकारात्मक ना नकारात्मक)                                                                                   |
| 27. | मुझे लगता है के मेरी बीमारी अन्य दूसरी चिंताओं के कारण बढ़ रही है। (जैसे-नौकरी जाने का दर, लोगों की प्रतिक्रिया/व्यवहार positive रिपोर्ट के बाद, आदि) |
| 28. | Hospital में रहने के कारण भी ये बीमारी फैलती है।                                                                                                      |
| 29. | कोरोना को लेकर लोगों के नकारात्मक सोच से मुझे घबराहट होती है।                                                                                         |
| 30. | मुझे लगता है कि अस्पताल में रहने के बाद मुझे नींद आने में कठिनाई हो रही है।                                                                           |
| 31. | मुझे लगता है के कोरोना से लड़ने में हमारी सकारात्मक सोच का एक बहुत बड़ा योगदान है।                                                                    |
| 32. | इस बीमारी का मेरी नींद पर कोई असर नै पड़ा है।                                                                                                         |
| 33. | मुझे इस बात का दुख है के मेरे करीबी लोगों को यह लगता है के यह बीमारी मुझे मेरे लापरवाही से हुई।                                                       |
| 34. | मैं अपने रक्त का नमूना लेने और अपने परीक्षण परिणाम आने के बीच की अवधि में बेहद चिंतित था/थी।                                                          |
| 35. | कोरोना से positive होने के बाद बार बार लगातार स्वास्थ्य कर्मचारियों द्वारा calls आने से मुझे समस्या हो रही है।                                        |
| 36. | इस बीमारी से उभरने में मेरे परिवार/दोस्तों का योगदान अत्यधिक आवश्यक है।                                                                               |
| 37. | मुझे लगता है कि मेरी रिपोर्ट घोषित होने के बाद सामाजिक जागरूकता के बजाय सामाजिक भेदभाव हुआ है।                                                        |
| 38. | Positive रिपोर्ट आने के बाद मुझे लगता है के यह सब मेरा दोष है।                                                                                        |
| 39. | मुझे चिंता है के लोग मेरे बारे में क्या सोचते है।                                                                                                     |
| 40. | मैं महसूस कर सकता हूं /सकती हूं कि लोगों ने रिपोर्ट के बाद मेरे साथ भेदभाव करना शुरू कर दिया है।                                                      |

**Supplementary Table 3: Content Validity Ratio template circulated to 8 subject experts**

| Instructions-Based on your opinions please encircle any one of the options against each item |                                                                                                                        |                      |                               |                |
|----------------------------------------------------------------------------------------------|------------------------------------------------------------------------------------------------------------------------|----------------------|-------------------------------|----------------|
| S.No.                                                                                        | Item description                                                                                                       | Not a necessary item | Useful but not essential item | Essential item |
| 1.                                                                                           | मुझे लगता है कि मुझे संक्रमित व्यक्ति के करीबी संपर्क से संक्रमण मिला है।                                              | ①                    | ②                             | ③              |
| 2.                                                                                           | मैं पूरी तरह से परीक्षण रिपोर्ट पर विश्वास करता हूँ/करती हूँ ।                                                         | ①                    | ②                             | ③              |
| 3.                                                                                           | मेरे सहकर्मियों की वजह से मेरी रिपोर्ट positive आई है।                                                                 | ①                    | ②                             | ③              |
| 4.                                                                                           | मेरी कमजोर immunity/प्रतिरक्षा के कारण मुझे संक्रमण हुआ है।                                                            | ①                    | ②                             | ③              |
| 5.                                                                                           | यह बीमारी के पॉज़िटिव (Positive) परीक्षण किए गए व्यक्तियों को डॉक्टरों की करीबी निगरानी में रखा जाना चाहिए।            | ①                    | ②                             | ③              |
| 6.                                                                                           | यह बीमारी के लक्षण आम फ्लू के समान हैं।                                                                                | ①                    | ②                             | ③              |
| 7.                                                                                           | मेरी रिपोर्ट के बाद, मैं उन लोगों के बारे में चिंतित था/थी जो मेरे संपर्क में आए थे।                                   | ①                    | ②                             | ③              |
| 8.                                                                                           | मेरी रिपोर्ट के बारे में मेरे करीबी लोगों को सूचित करना बहुत आवश्यक और सही है।                                         | ①                    | ②                             | ③              |
| 9.                                                                                           | शरीर की immunity/प्रतिरक्षा, कोविड से लड़ने के साथ-साथ रक्षा कर सकती है।                                               | ①                    | ②                             | ③              |
| 10.                                                                                          | मुझे अच्छा लगता है जब मेरे दोस्त और परिवार के सदस्य मुझसे फोन पर संपर्क करते हैं।                                      | ①                    | ②                             | ③              |
| 11.                                                                                          | यह बीमारी के कारण सूखी खांसी, बुखार और सांस फूलना होता है।                                                             | ①                    | ②                             | ③              |
| 12.                                                                                          | मेरे अपने लोग मेरी रिपोर्ट जानने के बाद मुझसे दूर हो रहे हैं।                                                          | ①                    | ②                             | ③              |
| 13.                                                                                          | मैं इस महामारी के दौरान स्वास्थ्य देखभाल श्रमिकों द्वारा प्रदान की गई सेवाओं के लिए आभारी महसूस करता हूँ/करती हूँ ।    | ①                    | ②                             | ③              |
| 14.                                                                                          | यह बीमारी के अधिकांश रोगियों को प्राथमिक उपचार की आवश्यकता होती है, केवल कुछ लोगों को विशेष उपचार की आवश्यकता होती है। | ①                    | ②                             | ③              |

|     |                                                                                                                                                       |   |   |   |
|-----|-------------------------------------------------------------------------------------------------------------------------------------------------------|---|---|---|
| 15. | मुझे नहीं लगता कि मेरे मामले में अस्पताल में रहने की सख्त आवश्यकता है।                                                                                | ① | ② | ③ |
| 16. | मुझे लगता है कि लोग मेरी स्थिति को समझ सकते हैं और ठीक होने के बाद वे मुझे स्वीकार करेंगे।                                                            | ① | ② | ③ |
| 17. | परीक्षण रिपोर्ट पॉज़िटिव (Positive) आने के बाद मैं दुखी और चिंतित महसूस कर रहा था/रही थी।                                                             | ① | ② | ③ |
| 18. | रिपोर्ट के बाद मेरी दिनचर्या पूरी तरह से गड़बड़ा गई है।                                                                                               | ① | ② | ③ |
| 19. | मेरे रक्त का नमूना लेने के बाद मैं परीक्षण रिपोर्ट का सामना करने के लिए मानसिक रूप से तैयार था/थी।                                                    | ① | ② | ③ |
| 20. | परीक्षण की रिपोर्ट पॉज़िटिव (Positive) आने के बाद मैं खुद को दोषी और कलंकित महसूस कर रहा था/रही थी।                                                   | ① | ② | ③ |
| 21. | किसी भी बड़ी शारीरिक चोट या बीमारी के लक्षणों के बिना लंबे समय तक अस्पताल में रहने का यह मेरा पहला अनुभव है।                                          | ① | ② | ③ |
| 22. | मुझे अपने अस्पताल में रहने के दौरान बहुत अकेलापन महसूस होने लगा है।                                                                                   | ① | ② | ③ |
| 23. | <b>परीक्षण करने की विधि पर मुझे संदेह है।</b>                                                                                                         | ① | ② | ③ |
| 24. | परीक्षण रिपोर्ट के बाद मेरे परिवार, दोस्तों और सहकर्मियों के बारे में मेरे दिमाग में कई विचार चल रहे थे।                                              | ① | ② | ③ |
| 25. | मुझे लगता है कि वर्तमान स्थिति में भगवान से प्रार्थना करने से मुझे शक्ति और साहस मिलता है।                                                            | ① | ② | ③ |
| 26. | इस बीमारी का मुझ पर कोई प्रभाव नहीं है। (ना सकारात्मक ना नकारात्मक)                                                                                   | ① | ② | ③ |
| 27. | मुझे लगता है कि मेरी बीमारी अन्य दूसरी चिंताओं के कारण बढ़ रही है। (जैसे-नौकरी जाने का दर, लोगों की प्रतिक्रिया/व्यवहार positive रिपोर्ट के बाद, आदि) | ① | ② | ③ |
| 28. | <b>Hospital में रहने के कारण भी ये बीमारी फैलती है।</b>                                                                                               | ① | ② | ③ |

|     |                                                                                                                |   |   |   |
|-----|----------------------------------------------------------------------------------------------------------------|---|---|---|
| 29. | कोरोना को लेकर लोगों के नकारात्मक सोच से मुझे घबराहट होती है।                                                  | ① | ② | ③ |
| 30. | मुझे लगता है कि अस्पताल में रहने के बाद मुझे नींद आने में कठिनाई हो रही है।                                    | ① | ② | ③ |
| 31. | मुझे लगता है के कोरोना से लड़ने में हमारी सकारात्मक सोच का एक बहुत बड़ा योगदान है।                             | ① | ② | ③ |
| 32. | इस बीमारी का मेरी नींद पर कोई असर नै पड़ा है।                                                                  | ① | ② | ③ |
| 33. | मुझे इस बात का दुख है के मेरे करीबी लोगों को यह लगता है के यह बीमारी मुझे मेरे लापरवाही से हुई।                | ① | ② | ③ |
| 34. | मैं अपने रक्त का नमूना लेने और अपने परीक्षण परिणाम आने के बीच की अवधि में बेहद चिंतित था/थी।                   | ① | ② | ③ |
| 35. | कोरोना से positive होने के बाद बार बार लगातार स्वास्थ्य कर्मचारियों द्वारा calls आने से मुझे समस्या हो रही है। | ① | ② | ③ |
| 36. | इस बीमारी से उभरने में मेरे परिवार/दोस्तों का योगदान अत्यधिक आवश्यक है।                                        | ① | ② | ③ |
| 37. | मुझे लगता है कि मेरी रिपोर्ट घोषित होने के बाद सामाजिक जागरूकता के बजाय सामाजिक भेदभाव हुआ है।                 | ① | ② | ③ |
| 38. | Positive रिपोर्ट आने के बाद मुझे लगता है के यह सब मेरा दोष है।                                                 | ① | ② | ③ |
| 39. | मुझे चिंता है के लोग मेरे बारे में क्या सोचते है।                                                              | ① | ② | ③ |
| 40. | मैं महसूस कर सकता हूं /सकती हूं कि लोगों ने रिपोर्ट के बाद मेरे साथ भेदभाव करना शुरू कर दिया है।               | ① | ② | ③ |

Based on expert opinions the items highlighted in **red** had CVR less than 0.75 and hence were discarded.

Supplementary Table 4: Lawshe values

| Number of experts | Minimum value |
|-------------------|---------------|
| 5                 | 0.99          |
| 6                 | 0.99          |
| 7                 | 0.99          |
| ⇨ 8               | 0.75 ⇨        |

Supplementary Figure 1: Few verbatims

करीबी लोगों से  
संक्रमण

"मेरे अस्पताल आने से एक दिन पहले मेरे office पर एक लड़की पॉजिटिव थी। मेरे सहित office पर अन्य लोगों को भी उससे संक्रमण हो सकता है।"

अस्पताल में  
रहने की सख्त  
आवश्यकता है

"मुझमें confidence है और मुझे लगता है कि इस संक्रमण को positive भावना से लेने के लिए व्यक्ति के confidence पर निर्भर करता है। मुझे नहीं लगता कि इस बीमारी के लिए hospital के treatment की ज़रूरत है।"

रिपोर्ट घोषित  
होने के बाद  
भेदभाव

"मेरे घर के मालिक को मेरी कोविड स्थिति के बारे में बहुत संदेह था और वह मेरे रहने को जारी रखने के मूड में नहीं था।"

**Supplementary Table 5: Content Validity Index template circulated to 8 subject experts**

| Instructions-Based on your opinions please encircle any one of the options against each item |                                                                                                                     |              |                     |                                   |               |
|----------------------------------------------------------------------------------------------|---------------------------------------------------------------------------------------------------------------------|--------------|---------------------|-----------------------------------|---------------|
| S.No.                                                                                        | Item description                                                                                                    | Not relevant | Item needs revision | Relevant but needs minor revision | Very relevant |
| 1.                                                                                           | मुझे लगता है कि मुझे संक्रमित व्यक्ति के करीबी संपर्क से संक्रमण मिला है।                                           | ①            | ②                   | ③                                 | ④             |
| 2.                                                                                           | मैं पूरी तरह से परीक्षण रिपोर्ट पर विश्वास करता हूँ/करती हूँ ।                                                      | ①            | ②                   | ③                                 | ④             |
| 3.                                                                                           | मेरे सहकर्मियों की वजह से मेरी रिपोर्ट positive आई है।                                                              | ①            | ②                   | ③                                 | ④             |
| 4.                                                                                           | मेरी कमजोर immunity/प्रतिरक्षा के कारण मुझे संक्रमण हुआ है।                                                         | ①            | ②                   | ③                                 | ④             |
| 5.                                                                                           | यह बीमारी के पॉज़िटिव (Positive) परीक्षण किए गए व्यक्तियों को डॉक्टरों की करीबी निगरानी में रखा जाना चाहिए।         | ①            | ②                   | ③                                 | ④             |
| 6.                                                                                           | यह बीमारी के लक्षण आम फ्लू के समान हैं।                                                                             | ①            | ②                   | ③                                 | ④             |
| 7.                                                                                           | मेरी रिपोर्ट के बाद, मैं उन लोगों के बारे में चिंतित था/थी जो मेरे संपर्क में आए थे।                                | ①            | ②                   | ③                                 | ④             |
| 8.                                                                                           | मेरी रिपोर्ट के बारे में मेरे करीबी लोगों को सूचित करना बहुत आवश्यक और सही है।                                      | ①            | ②                   | ③                                 | ④             |
| 9.                                                                                           | शरीर की immunity/प्रतिरक्षा, कोविड से लड़ने के साथ-साथ रक्षा कर सकती है।                                            | ①            | ②                   | ③                                 | ④             |
| 10.                                                                                          | मुझे अच्छा लगता है जब मेरे दोस्त और परिवार के सदस्य मुझसे फोन पर संपर्क करते हैं।                                   | ①            | ②                   | ③                                 | ④             |
| 11.                                                                                          | यह बीमारी के कारण सूखी खांसी, बुखार और सांस फूलना होता है।                                                          | ①            | ②                   | ③                                 | ④             |
| 12.                                                                                          | मेरे अपने लोग मेरी रिपोर्ट जानने के बाद मुझसे दूर हो रहे हैं।                                                       | ①            | ②                   | ③                                 | ④             |
| 13.                                                                                          | मैं इस महामारी के दौरान स्वास्थ्य देखभाल श्रमिकों द्वारा प्रदान की गई सेवाओं के लिए आभारी महसूस करता हूँ/करती हूँ । | ①            | ②                   | ③                                 | ④             |

|     |                                                                                                                                                               |   |   |   |   |
|-----|---------------------------------------------------------------------------------------------------------------------------------------------------------------|---|---|---|---|
| 14. | यह बीमारी के अधिकांश रोगियों को प्राथमिक उपचार की आवश्यकता होती है, केवल कुछ लोगों को विशेष उपचार की आवश्यकता होती है।                                        | ① | ② | ③ | ④ |
| 15. | मुझे नहीं लगता कि मेरे मामले में अस्पताल में रहने की सख्त आवश्यकता है।                                                                                        | ① | ② | ③ | ④ |
| 16. | मुझे लगता है कि लोग मेरी स्थिति को समझ सकते हैं और ठीक होने के बाद वे मुझे स्वीकार करेंगे।                                                                    | ① | ② | ③ | ④ |
| 17. | परीक्षण रिपोर्ट पॉज़िटिव (Positive) आने के बाद मैं दुखी और चिंतित महसूस कर रहा था/रही थी।                                                                     | ① | ② | ③ | ④ |
| 18. | रिपोर्ट के बाद मेरी दिनचर्या पूरी तरह से गड़बड़ा गई है।                                                                                                       | ① | ② | ③ | ④ |
| 19. | मेरे रक्त का नमूना लेने के बाद मैं परीक्षण रिपोर्ट का सामना करने के लिए मानसिक रूप से तैयार था/थी।                                                            | ① | ② | ③ | ④ |
| 20. | परीक्षण की रिपोर्ट पॉज़िटिव (Positive) आने के बाद मैं खुद को दोषी और कलंकित महसूस कर रहा था/रही थी।                                                           | ① | ② | ③ | ④ |
| 21. | किसी भी बड़ी शारीरिक चोट या बीमारी के लक्षणों के बिना लंबे समय तक अस्पताल में रहने का यह मेरा पहला अनुभव है।                                                  | ① | ② | ③ | ④ |
| 22. | मुझे अपने अस्पताल में रहने के दौरान बहुत अकेलापन महसूस होने लगा है।                                                                                           | ① | ② | ③ | ④ |
| 23. | परीक्षण रिपोर्ट के बाद मेरे परिवार, दोस्तों और सहकर्मियों के बारे में मेरे दिमाग में कई विचार चल रहे थे।                                                      | ① | ② | ③ | ④ |
| 24. | मुझे लगता है कि वर्तमान स्थिति में भगवान से प्रार्थना करने से मुझे शक्ति और साहस मिलता है।                                                                    | ① | ② | ③ | ④ |
| 25. | <b>इस बीमारी का मुझ पर कोई प्रभाव नहीं है। (ना सकारात्मक ना नकारात्मक)</b>                                                                                    | ① | ② | ③ | ④ |
| 26. | <b>मुझे लगता है के मेरी बीमारी अन्य दूसरी चिंताओं के कारण बढ़ रही है। (जैसे- नौकरी जाने का दर, लोगों की प्रतिक्रिया/व्यवहार positive रिपोर्ट के बाद, आदि)</b> | ① | ② | ③ | ④ |

|     |                                                                                                                |   |   |   |   |
|-----|----------------------------------------------------------------------------------------------------------------|---|---|---|---|
| 27. | मुझे लगता है कि अस्पताल में रहने के बाद मुझे नींद आने में कठिनाई हो रही है।                                    | ① | ② | ③ | ④ |
| 28. | मुझे लगता है के कोरोना से लड़ने में हमारी सकारात्मक सोच का एक बहुत बड़ा योगदान है।                             | ① | ② | ③ | ④ |
| 29. | इस बीमारी का मेरी नींद पर कोई असर नै पड़ा है।                                                                  | ① | ② | ③ | ④ |
| 30. | मैं अपने रक्त का नमूना लेने और अपने परीक्षण परिणाम आने के बीच की अवधि में बेहद चिंतित था/थी।                   | ① | ② | ③ | ④ |
| 31. | कोरोना से positive होने के बाद बार बार लगातार स्वास्थ्य कर्मचारियों द्वारा calls आने से मुझे समस्या हो रही है। | ① | ② | ③ | ④ |
| 32. | इस बीमारी से उभरने में मेरे परिवार/दोस्तों का योगदान अत्यधिक आवश्यक है।                                        | ① | ② | ③ | ④ |
| 33. | मुझे लगता है कि मेरी रिपोर्ट घोषित होने के बाद सामाजिक जागरूकता के बजाय सामाजिक भेदभाव हुआ है।                 | ① | ② | ③ | ④ |
| 34. | मुझे चिंता है के लोग मेरे बारे में क्या सोचते है।                                                              | ① | ② | ③ | ④ |
| 35. | मैं महसूस कर सकता हूं /सकती हूं कि लोगों ने रिपोर्ट के बाद मेरे साथ भेदभाव करना शुरू कर दिया है।               | ① | ② | ③ | ④ |

The above table has 35 items after deletion of 5 items based on CVR threshold of 0.75. Out of the 35 items, 7 items highlighted in red were discarded as these had I-CVI below 70%. The tool circulated to 112 patients for factor analysis had 28 items.

Supplementary Table 6: List of 28 Survey items rated by scale users on likert scale

| निर्देश-प्रत्येक प्रश्न के लिए आप पांच में से किसी एक विकल्प को चुन सकते हैं जो आपके अनुसार सबसे सही हो |                                                                                                                        |                      |       |          |      |                     |
|---------------------------------------------------------------------------------------------------------|------------------------------------------------------------------------------------------------------------------------|----------------------|-------|----------|------|---------------------|
| क्र.                                                                                                    | प्रश्न                                                                                                                 | पूर्णांकित:<br>असहमत | असहमत | नहीं पता | सहमत | पूर्णांकित:<br>सहमत |
| 1.                                                                                                      | मेरे सहकर्मियों की वजह से मेरी रिपोर्ट positive आई है।                                                                 | ①                    | ②     | ③        | ④    | ⑤                   |
| 2.                                                                                                      | मेरे शरीर की प्रतिरोधक क्षमता कोविद (कोविद-19) से लड़ने में मदद करती है।                                               | ①                    | ②     | ③        | ④    | ⑤                   |
| 3.                                                                                                      | मुझे लगता है कि मुझे संक्रमित व्यक्ति के करीबी संपर्क से संक्रमण मिला है।                                              | ①                    | ②     | ③        | ④    | ⑤                   |
| 4.                                                                                                      | यह बीमारी के लक्षण आम फ्लू के समान हैं।                                                                                | ①                    | ②     | ③        | ④    | ⑤                   |
| 5.                                                                                                      | मेरी कमजोर immunity/प्रतिरक्षा के कारण मुझे संक्रमण हुआ है।                                                            | ①                    | ②     | ③        | ④    | ⑤                   |
| 6.                                                                                                      | यह बीमारी के कारण सूखी खांसी, बुखार और सांस फूलना होता है।                                                             | ①                    | ②     | ③        | ④    | ⑤                   |
| 7.                                                                                                      | यह बीमारी के पॉज़िटिव (Positive) परीक्षण किए गए व्यक्तियों को डॉक्टरों की करीबी निगरानी में रखा जाना चाहिए।            | ①                    | ②     | ③        | ④    | ⑤                   |
| 8.                                                                                                      | यह बीमारी के अधिकांश रोगियों को प्राथमिक उपचार की आवश्यकता होती है, केवल कुछ लोगों को विशेष उपचार की आवश्यकता होती है। | ①                    | ②     | ③        | ④    | ⑤                   |
| 9.                                                                                                      | परीक्षण रिपोर्ट पॉज़िटिव (Positive) आने के बाद मैं दुखी और चिंतित महसूस कर रहा था/रही थी।                              | ①                    | ②     | ③        | ④    | ⑤                   |

|     |                                                                                                          |   |   |   |   |   |
|-----|----------------------------------------------------------------------------------------------------------|---|---|---|---|---|
| 10. | परीक्षण की रिपोर्ट पॉज़िटिव (Positive) आने के बाद मैं खुद को दोषी और कलंकित महसूस कर रहा था/रही थी।      | ① | ② | ③ | ④ | ⑤ |
| 11. | परीक्षण रिपोर्ट के बाद मेरे परिवार, दोस्तों और सहकर्मियों के बारे में मेरे दिमाग में कई विचार चल रहे थे। | ① | ② | ③ | ④ | ⑤ |
| 12. | मैं पूरी तरह से परीक्षण रिपोर्ट पर विश्वास करता हूँ/करती हूँ।                                            | ① | ② | ③ | ④ | ⑤ |
| 13. | मेरी रिपोर्ट के बाद, मैं उन लोगों के बारे में चिंतित था/थी जो मेरे संपर्क में आए थे।                     | ① | ② | ③ | ④ | ⑤ |
| 14. | मेरे अपने लोग मेरी रिपोर्ट जानने के बाद मुझसे दूर हो रहे हैं।                                            | ① | ② | ③ | ④ | ⑤ |
| 15. | मुझे लगता है कि मेरी रिपोर्ट घोषित होने के बाद सामाजिक जागरूकता के बजाय सामाजिक भेदभाव हुआ है।           | ① | ② | ③ | ④ | ⑤ |
| 16. | मैं महसूस कर सकता हूँ /सकती हूँ कि लोगों ने रिपोर्ट के बाद मेरे साथ भेदभाव करना शुरू कर दिया है।         | ① | ② | ③ | ④ | ⑤ |
| 17. | मुझे लगता है कि लोग मेरी स्थिति को समझ सकते हैं और ठीक होने के बाद वे मुझे स्वीकार करेंगे।               | ① | ② | ③ | ④ | ⑤ |
| 18. | मेरी रिपोर्ट के बारे में मेरे करीबी लोगों को सूचित करना बहुत आवश्यक और सही है।                           | ① | ② | ③ | ④ | ⑤ |
| 19. | मुझे अच्छा लगता है जब मेरे दोस्त और परिवार के सदस्य मुझसे फोन पर संपर्क करते हैं।                        | ① | ② | ③ | ④ | ⑤ |
| 20. | रिपोर्ट के बाद मेरी दिनचर्या पूरी तरह से गड़बड़ा गई है।                                                  | ① | ② | ③ | ④ | ⑤ |

|     |                                                                                                                    |   |   |   |   |   |
|-----|--------------------------------------------------------------------------------------------------------------------|---|---|---|---|---|
| 21. | मेरे रक्त का नमूना लेने के बाद मैं परीक्षण रिपोर्ट का सामना करने के लिए मानसिक रूप से तैयार था/थी।                 | ① | ② | ③ | ④ | ⑤ |
| 22. | किसी भी बड़ी शारीरिक चोट या बीमारी के लक्षणों के बिना लंबे समय तक अस्पताल में रहने का यह मेरा पहला अनुभव है।       | ① | ② | ③ | ④ | ⑤ |
| 23. | मुझे अपने अस्पताल में रहने के दौरान बहुत अकेलापन महसूस होने लगा है।                                                | ① | ② | ③ | ④ | ⑤ |
| 24. | मुझे नहीं लगता कि मेरे मामले में अस्पताल में रहने की सख्त आवश्यकता है।                                             | ① | ② | ③ | ④ | ⑤ |
| 25. | मैं इस महामारी के दौरान स्वास्थ्य देखभाल श्रमिकों द्वारा प्रदान की गई सेवाओं के लिए आभारी महसूस करता हूँ/करती हूँ। | ① | ② | ③ | ④ | ⑤ |
| 26. | मुझे लगता है कि वर्तमान स्थिति में भगवान से प्रार्थना करने से मुझे शक्ति और साहस मिलता है।                         | ① | ② | ③ | ④ | ⑤ |
| 27. | मुझे लगता है कि अस्पताल में रहने के बाद मुझे नींद आने में कठिनाई हो रही है।                                        | ① | ② | ③ | ④ | ⑤ |
| 28. | मैं अपने रक्त का नमूना लेने और अपने परीक्षण परिणाम आने के बीच की अवधि में बेहद चिंतित था/थी।                       | ① | ② | ③ | ④ | ⑤ |

**Figure 1: Steps of COPING tool validation**

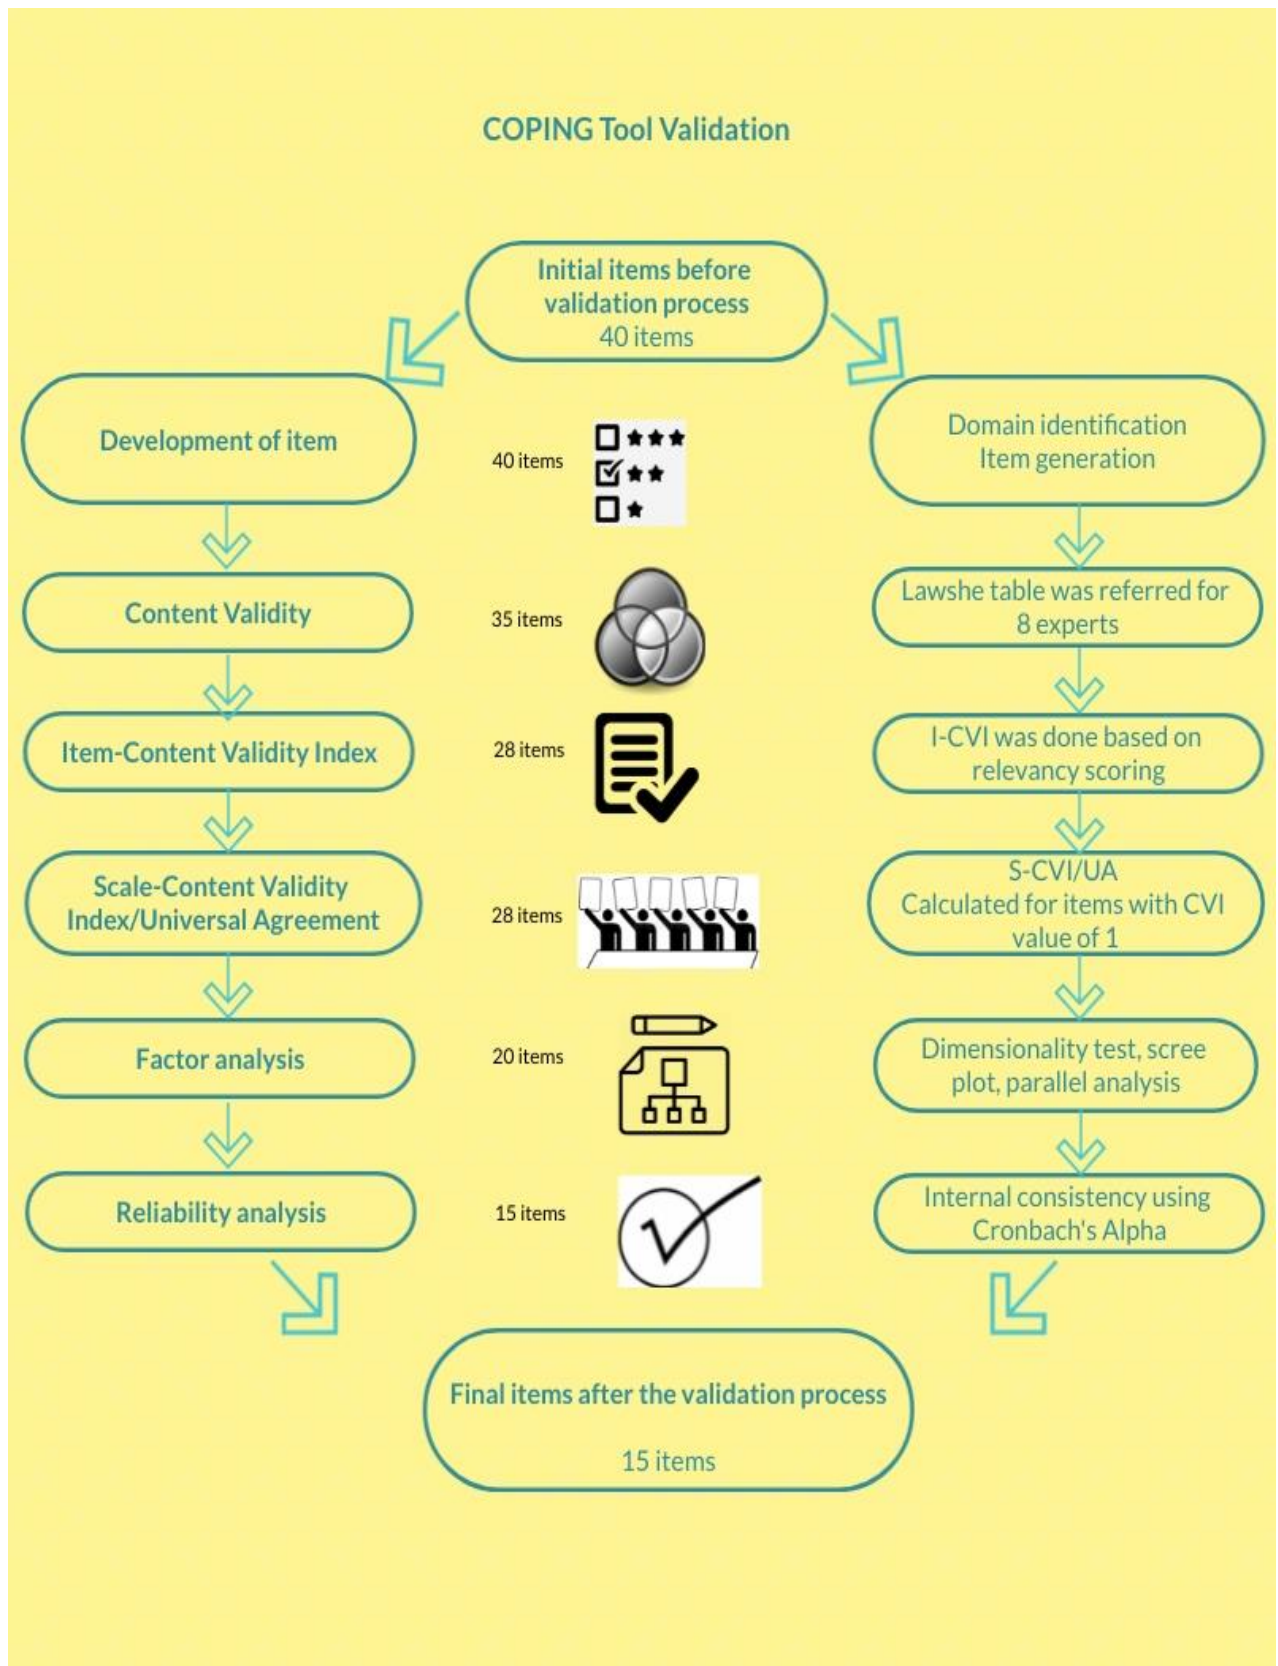

**Figure 2: Log of patients who could not be included in the study**

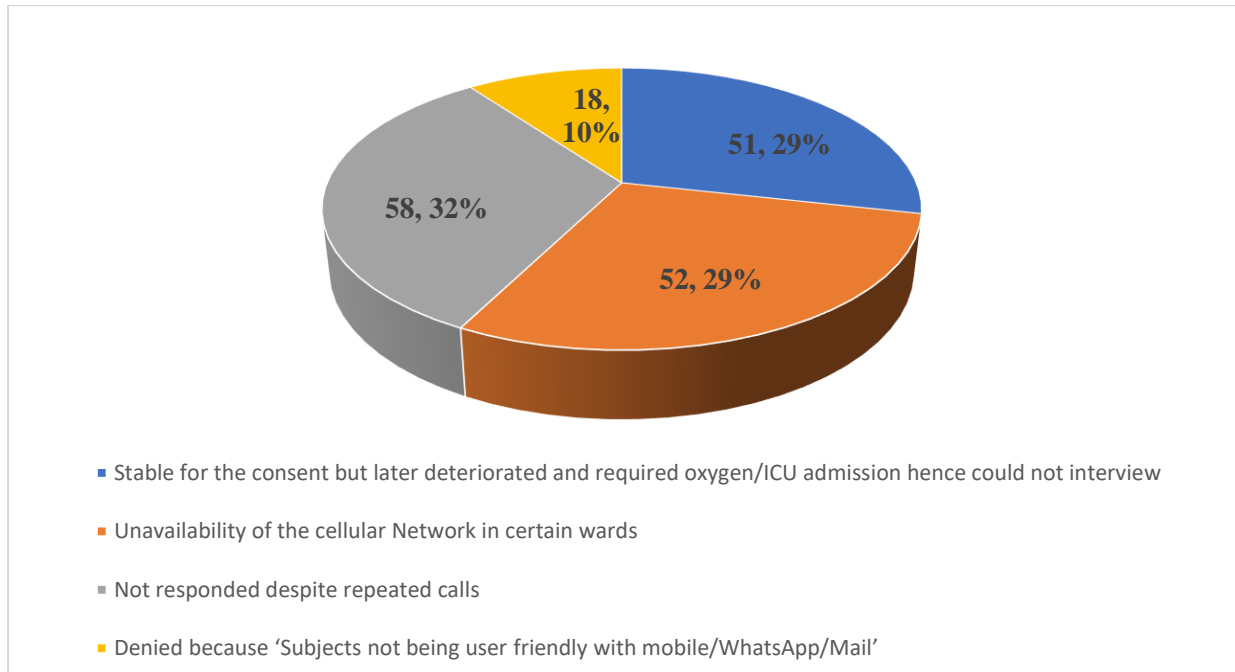

**Table 1: Sociodemographic details of study participants (N=112)**

| Category    | Sub-category | Number | Percentage |
|-------------|--------------|--------|------------|
| Gender      | Male         | 79     | 70.5       |
|             | Female       | 33     | 29.5       |
| Age (years) | 25 or less   | 25     | 22.3       |
|             | 26-50        | 54     | 48.2       |
|             | 51 or above  | 33     | 29.5       |
| Area        | Urban        | 95     | 84.8       |
|             | Rural        | 17     | 15.2       |
| Occupation  | Student      | 14     | 12.5       |
|             | Service      | 37     | 33         |
|             | Labourer     | 12     | 10.7       |
|             | Homemaker    | 18     | 16.1       |
|             | Other        | 31     | 27.7       |

**Table 2: KMO and Bartlett's Test**

|                                                 |      |         |
|-------------------------------------------------|------|---------|
| Kaiser-Meyer-Olkin Measure of Sampling Adequacy |      | .664    |
| Approx. Chi-Square                              |      | 968.334 |
| Bartlett's Test of Sphericity                   | df   | 378     |
|                                                 | Sig. | .000    |

**Figure 3:**

**Scree Plot**

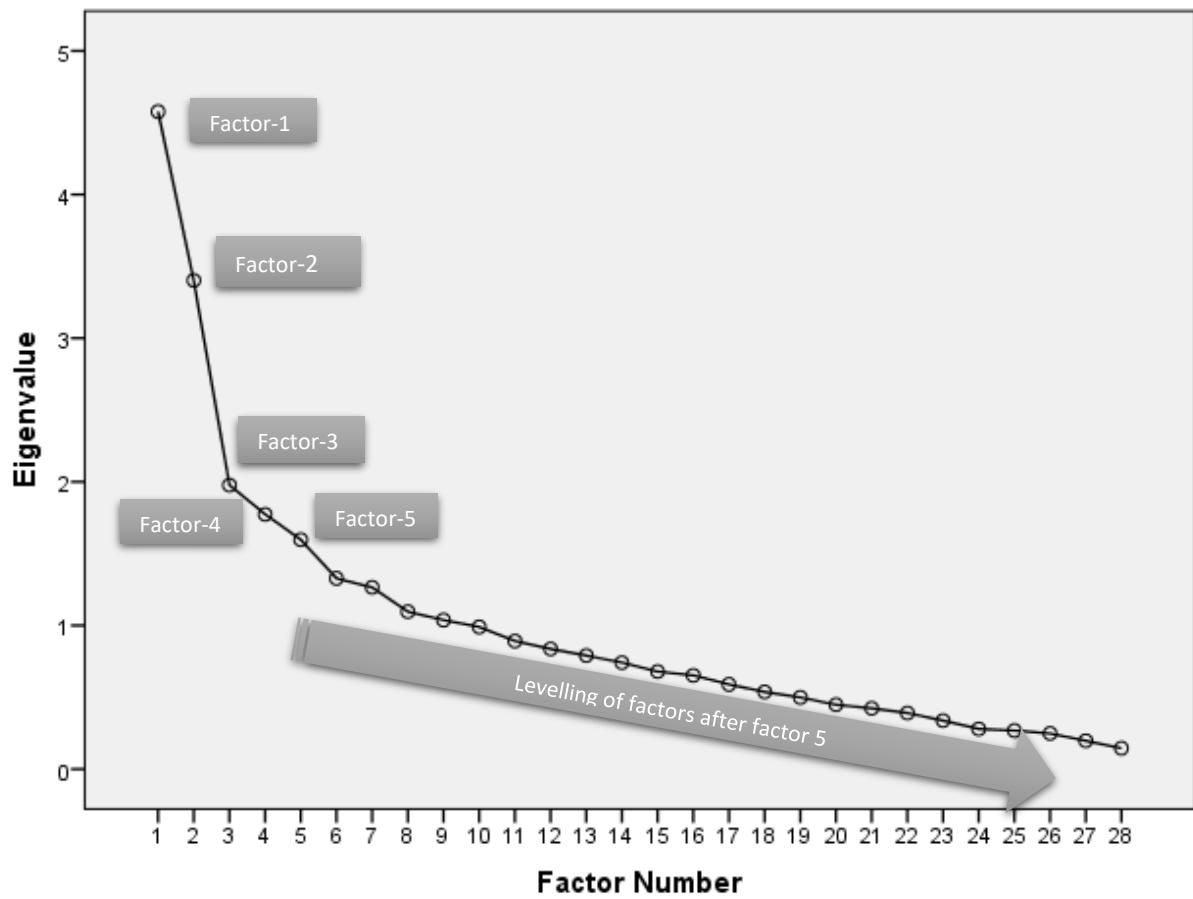

Supplementary Table 7: Items after factor analysis

| निर्देश-प्रत्येक प्रश्न के लिए आप पांच में से किसी एक विकल्प को चुन सकते हैं जो आपके अनुसार सबसे सही हो |                                                                                                                        |                    |       |          |      |                   |
|---------------------------------------------------------------------------------------------------------|------------------------------------------------------------------------------------------------------------------------|--------------------|-------|----------|------|-------------------|
| क्र.                                                                                                    | प्रश्न                                                                                                                 | पूर्णयितः<br>असहमत | असहमत | नहीं पता | सहमत | पूर्णयितः<br>सहमत |
| 1.                                                                                                      | मेरे सहकर्मियों की वजह से मेरी रिपोर्ट positive आई है।                                                                 | ①                  | ②     | ③        | ④    | ⑤                 |
| 2.                                                                                                      | मेरे शरीर की प्रतिरोधक क्षमता कोविद (कोविद-19) से लड़ने में मदद करती है।                                               | ①                  | ②     | ③        | ④    | ⑤                 |
| 3.                                                                                                      | मुझे लगता है कि मुझे संक्रमित व्यक्ति के करीबी संपर्क से संक्रमण मिला है।                                              | ①                  | ②     | ③        | ④    | ⑤                 |
| 4.                                                                                                      | यह बीमारी के लक्षण आम फ्लू के समान हैं।                                                                                | ①                  | ②     | ③        | ④    | ⑤                 |
| 5.                                                                                                      | मेरी कमजोर immunity/प्रतिरक्षा के कारण मुझे संक्रमण हुआ है।                                                            | ①                  | ②     | ③        | ④    | ⑤                 |
| 6.                                                                                                      | यह बीमारी के कारण सूखी खांसी, बुखार और सांस फूलना होता है।                                                             | ①                  | ②     | ③        | ④    | ⑤                 |
| 7.                                                                                                      | यह बीमारी के पॉज़िटिव (Positive) परीक्षण किए गए व्यक्तियों को डॉक्टरों की करीबी निगरानी में रखा जाना चाहिए।            | ①                  | ②     | ③        | ④    | ⑤                 |
| 8.                                                                                                      | यह बीमारी के अधिकांश रोगियों को प्राथमिक उपचार की आवश्यकता होती है, केवल कुछ लोगों को विशेष उपचार की आवश्यकता होती है। | ①                  | ②     | ③        | ④    | ⑤                 |
| 9.                                                                                                      | परीक्षण रिपोर्ट पॉज़िटिव (Positive) आने के बाद मैं दुखी और चिंतित महसूस कर रहा था/रही थी।                              | ①                  | ②     | ③        | ④    | ⑤                 |

|     |                                                                                                          |   |   |   |   |   |
|-----|----------------------------------------------------------------------------------------------------------|---|---|---|---|---|
| 10. | परीक्षण की रिपोर्ट पॉज़िटिव (Positive) आने के बाद मैं खुद को दोषी और कलंकित महसूस कर रहा था/रही थी।      | ① | ② | ③ | ④ | ⑤ |
| 11. | परीक्षण रिपोर्ट के बाद मेरे परिवार, दोस्तों और सहकर्मियों के बारे में मेरे दिमाग में कई विचार चल रहे थे। | ① | ② | ③ | ④ | ⑤ |
| 12. | मैं पूरी तरह से परीक्षण रिपोर्ट पर विश्वास करता हूँ/करती हूँ।                                            | ① | ② | ③ | ④ | ⑤ |
| 13. | मेरी रिपोर्ट के बाद, मैं उन लोगों के बारे में चिंतित था/थी जो मेरे संपर्क में आए थे।                     | ① | ② | ③ | ④ | ⑤ |
| 14. | <b>मेरे अपने लोग मेरी रिपोर्ट जानने के बाद मुझसे दूर हो रहे हैं।</b>                                     | ① | ② | ③ | ④ | ⑤ |
| 15. | मुझे लगता है कि मेरी रिपोर्ट घोषित होने के बाद सामाजिक जागरूकता के बजाय सामाजिक भेदभाव हुआ है।           | ① | ② | ③ | ④ | ⑤ |
| 16. | मैं महसूस कर सकता हूँ /सकती हूँ कि लोगों ने रिपोर्ट के बाद मेरे साथ भेदभाव करना शुरू कर दिया है।         | ① | ② | ③ | ④ | ⑤ |
| 17. | <b>मुझे लगता है कि लोग मेरी स्थिति को समझ सकते हैं और ठीक होने के बाद वे मुझे स्वीकार करेंगे।</b>        | ① | ② | ③ | ④ | ⑤ |
| 18. | मेरी रिपोर्ट के बारे में मेरे करीबी लोगों को सूचित करना बहुत आवश्यक और सही है।                           | ① | ② | ③ | ④ | ⑤ |
| 19. | मुझे अच्छा लगता है जब मेरे दोस्त और परिवार के सदस्य मुझसे फोन पर संपर्क करते हैं।                        | ① | ② | ③ | ④ | ⑤ |
| 20. | <b>रिपोर्ट के बाद मेरी दिनचर्या पूरी तरह से गड़बड़ा गई है।</b>                                           | ① | ② | ③ | ④ | ⑤ |

|     |                                                                                                                    |   |   |   |   |   |
|-----|--------------------------------------------------------------------------------------------------------------------|---|---|---|---|---|
| 21. | मेरे रक्त का नमूना लेने के बाद मैं परीक्षण रिपोर्ट का सामना करने के लिए मानसिक रूप से तैयार था/थी।                 | ① | ② | ③ | ④ | ⑤ |
| 22. | किसी भी बड़ी शारीरिक चोट या बीमारी के लक्षणों के बिना लंबे समय तक अस्पताल में रहने का यह मेरा पहला अनुभव है।       | ① | ② | ③ | ④ | ⑤ |
| 23. | मुझे अपने अस्पताल में रहने के दौरान बहुत अकेलापन महसूस होने लगा है।                                                | ① | ② | ③ | ④ | ⑤ |
| 24. | मुझे नहीं लगता कि मेरे मामले में अस्पताल में रहने की सख्त आवश्यकता है।                                             | ① | ② | ③ | ④ | ⑤ |
| 25. | मैं इस महामारी के दौरान स्वास्थ्य देखभाल श्रमिकों द्वारा प्रदान की गई सेवाओं के लिए आभारी महसूस करता हूँ/करती हूँ। | ① | ② | ③ | ④ | ⑤ |
| 26. | मुझे लगता है कि वर्तमान स्थिति में भगवान से प्रार्थना करने से मुझे शक्ति और साहस मिलता है।                         | ① | ② | ③ | ④ | ⑤ |
| 27. | मुझे लगता है कि अस्पताल में रहने के बाद मुझे नींद आने में कठिनाई हो रही है।                                        | ① | ② | ③ | ④ | ⑤ |
| 28. | मैं अपने रक्त का नमूना लेने और अपने परीक्षण परिणाम आने के बीच की अवधि में बेहद चिंतित था/थी।                       | ① | ② | ③ | ④ | ⑤ |

Items highlighted in **red** were removed after factor analysis. Out of 28, eight items were discarded. The tool had 20 items. To achieve the desired level of consistency (Cronbach's alpha above 0.7) further five items were removed. These are highlighted in **blue**.

Supplementary Table 8: Final 15 items after COPING tool validation

| निर्देश-प्रत्येक प्रश्न के लिए आप पांच में से किसी एक विकल्प को चुन सकते हैं जो आपके अनुसार सबसे सही हो |                                                                                                                        |                      |       |          |      |                     |
|---------------------------------------------------------------------------------------------------------|------------------------------------------------------------------------------------------------------------------------|----------------------|-------|----------|------|---------------------|
| क्र.                                                                                                    | प्रश्न                                                                                                                 | पूर्णांकित:<br>असहमत | असहमत | नहीं पता | सहमत | पूर्णांकित:<br>सहमत |
| 3.                                                                                                      | मुझे लगता है कि मुझे संक्रमित व्यक्ति के करीबी संपर्क से संक्रमण मिला है।                                              | ①                    | ②     | ③        | ④    | ⑤                   |
| 8.                                                                                                      | यह बीमारी के अधिकांश रोगियों को प्राथमिक उपचार की आवश्यकता होती है, केवल कुछ लोगों को विशेष उपचार की आवश्यकता होती है। | ①                    | ②     | ③        | ④    | ⑤                   |
| 9.                                                                                                      | परीक्षण रिपोर्ट पॉज़िटिव (Positive) आने के बाद मैं दुखी और चिंतित महसूस कर रहा था/रही थी।                              | ①                    | ②     | ③        | ④    | ⑤                   |
| 10.                                                                                                     | परीक्षण की रिपोर्ट पॉज़िटिव (Positive) आने के बाद मैं खुद को दोषी और कलंकित महसूस कर रहा था/रही थी।                    | ①                    | ②     | ③        | ④    | ⑤                   |
| 11.                                                                                                     | परीक्षण रिपोर्ट के बाद मेरे परिवार, दोस्तों और सहकर्मियों के बारे में मेरे दिमाग में कई विचार चल रहे थे।               | ①                    | ②     | ③        | ④    | ⑤                   |
| 12.                                                                                                     | मैं पूरी तरह से परीक्षण रिपोर्ट पर विश्वास करता हूँ/करती हूँ।                                                          | ①                    | ②     | ③        | ④    | ⑤                   |
| 13.                                                                                                     | मेरी रिपोर्ट के बाद, मैं उन लोगों के बारे में चिंतित था/थी जो मेरे संपर्क में आए थे।                                   | ①                    | ②     | ③        | ④    | ⑤                   |
| 15.                                                                                                     | मुझे लगता है कि मेरी रिपोर्ट घोषित होने के बाद सामाजिक जागरूकता के बजाय सामाजिक भेदभाव हुआ है।                         | ①                    | ②     | ③        | ④    | ⑤                   |

|     |                                                                                                                    |   |   |   |   |   |
|-----|--------------------------------------------------------------------------------------------------------------------|---|---|---|---|---|
| 16. | मैं महसूस कर सकता हूँ /सकती हूँ कि लोगों ने रिपोर्ट के बाद मेरे साथ भेदभाव करना शुरू कर दिया है।                   | ① | ② | ③ | ④ | ⑤ |
| 18. | मेरी रिपोर्ट के बारे में मेरे करीबी लोगों को सूचित करना बहुत आवश्यक और सही है।                                     | ① | ② | ③ | ④ | ⑤ |
| 19. | मुझे अच्छा लगता है जब मेरे दोस्त और परिवार के सदस्य मुझसे फोन पर संपर्क करते हैं।                                  | ① | ② | ③ | ④ | ⑤ |
| 24. | मुझे नहीं लगता कि मेरे मामले में अस्पताल में रहने की सख्त आवश्यकता है।                                             | ① | ② | ③ | ④ | ⑤ |
| 25. | मैं इस महामारी के दौरान स्वास्थ्य देखभाल श्रमिकों द्वारा प्रदान की गई सेवाओं के लिए आभारी महसूस करता हूँ/करती हूँ। | ① | ② | ③ | ④ | ⑤ |
| 27. | मुझे लगता है कि अस्पताल में रहने के बाद मुझे नींद आने में कठिनाई हो रही है।                                        | ① | ② | ③ | ④ | ⑤ |
| 28. | मैं अपने रक्त का नमूना लेने और अपने परीक्षण परिणाम आने के बीच की अवधि में बेहद चिंतित था/थी।                       | ① | ② | ③ | ④ | ⑤ |

**Supplementary Table 9: English translation of an original tool (Strongly Agree, Agree, Neutral, Disagree, Strongly disagree)**

- 1 I think I got the infection from close contact with an infected person.
- 2 Most patients with this disease require usual care, only a few require specialized treatment.
- 3 I was feeling sad and anxious after the test report came positive.
- 4 I was feeling guilty and stigmatized after the test report came positive.
- 5 After the test report, I had many thoughts running through my mind about my family, friends, and co-workers.
- 6 I completely trust the test reports.
- 7 After my report, I was concerned about the people who came in contact with me.
- 8 I feel there has been social discrimination instead of social awareness after my report was announced.
- 9 I can feel that people have started discriminating against me after the report.
- 10 It is very necessary and correct to inform the people close to me about my report.
- 11 I love it when my friends and family members contact me over the phone.
- 12 I don't think there is a dire need for a hospital stay in my case.
- 13 I feel grateful for the services provided by health care workers during this pandemic.
- 14 I find that I am having difficulty falling asleep after being in the hospital.

15 I was extremely worried during the period between taking my blood sample and getting my test results.
